# Supplementary material
Source: PubMed Central journal article supplement (PMC3149881)
Supplement: nucl0203_0208SD1.pdf [file nucl0203_0208SD1.pdf]

Raz et al.,  
Supplementary material

**Supplement 1: Co-localization of PAP, HSP70 and ubiquitin with pre-INI and inclusions.**

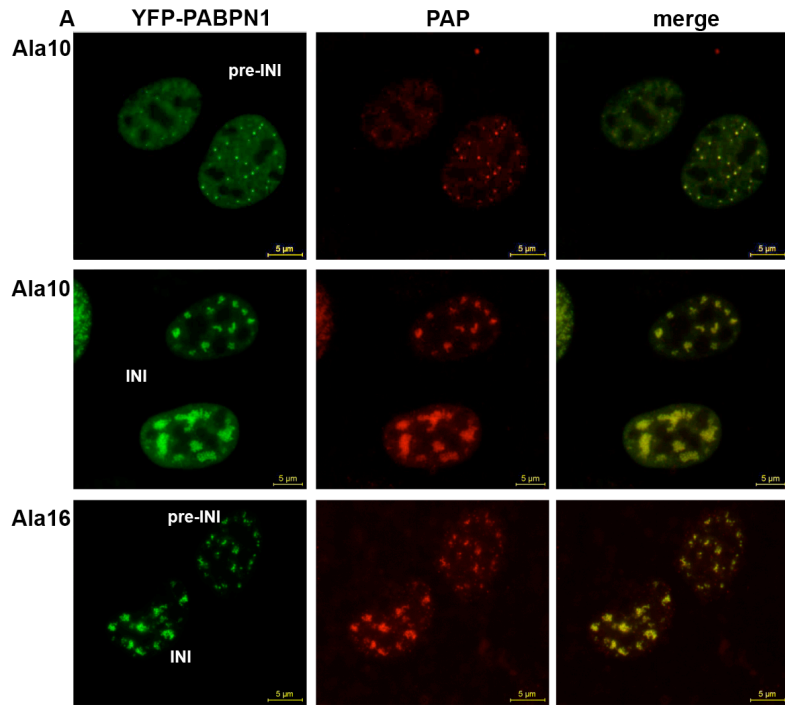

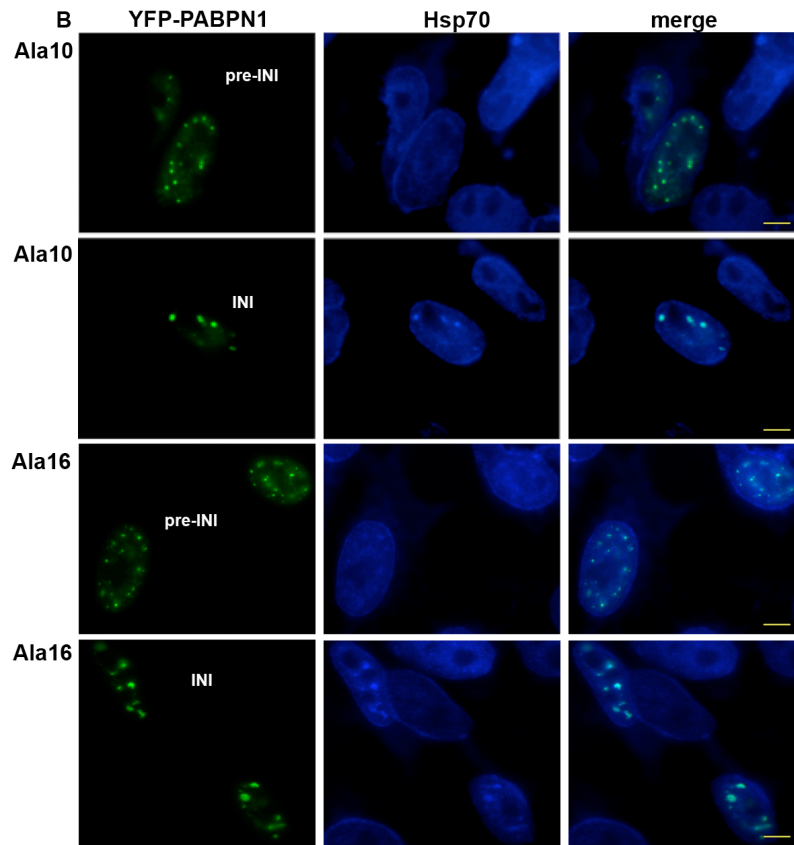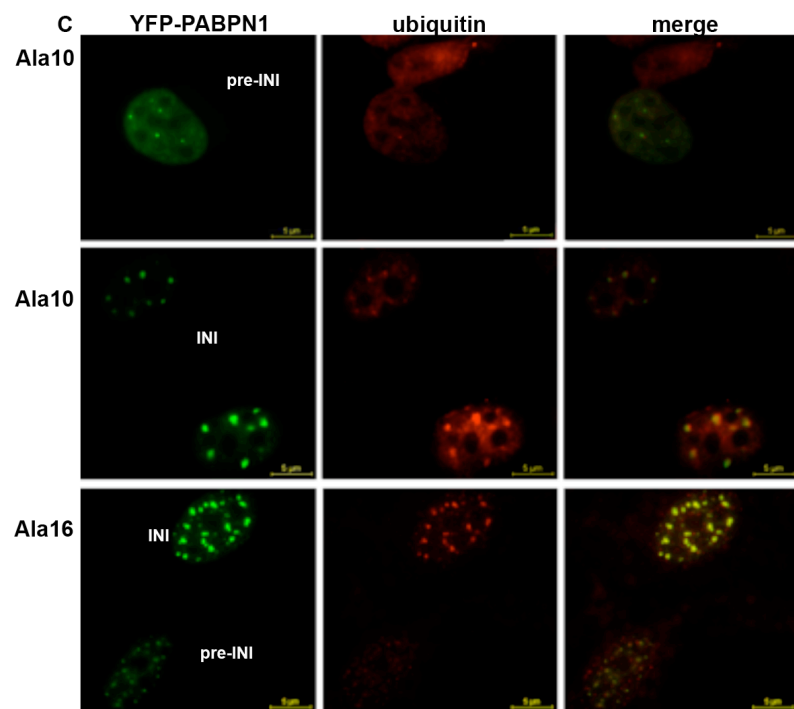

U2OS cells were transfected with YFP-Ala10-PABPN1 or YFP-Ala16-PABPN1 and 30 hours post transfection were fixed. Immuno-labeling was carried out with anti PAP (A);

anti HSP-70 (B) or anti-Ubiquitin (C) antibodies, which were visualized with Alexa 594-conjugated secondary antibody (A;C) or Deac-conjugated (B). Scale bars equal 5  $\mu$ m. Pre-I are labeled with PAP while inclusions co-localize with HSP70, PAP and Ubiquitin. Pre-I of PABPN1-Ala16 but not of PABPN1-Ala10 are also labeled with ubiquitin.

### Supplement 2: Changes in PABPN1 sub-cellular distribution during mitosis

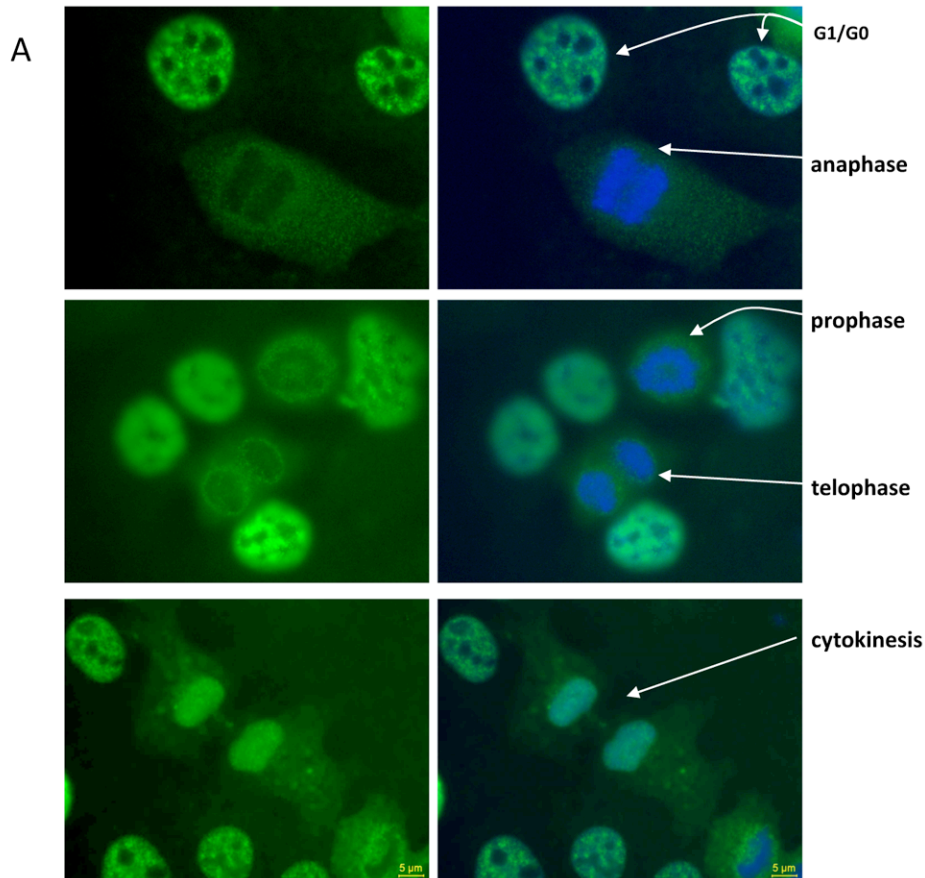

Changes in PABPN1 subcellular localization during cell division in GFP-Ala10-PABPN1 transfected U2OS cells. Cells were fixed 24 hours post transfection. GFP-PABPN1 is shown in green and DNA was counterstained with DAPI (blue). Selected steps in cell cycle are indicated.

### B. Change in PABPN1 aggregation during mitosis

Avi files of time laps imaging of GFP-Ala10-PABPN1 or GFP-Ala16-PABPN1 expressing cells 30 hours post transfection. Images were taken in 30 minutes intervals for 18 hours. Scale bar is indicated. Film shows disassemble of PABPN1 aggregates during cell division.

### Supplement 3: pre-I reversion.

Videos of time laps imaging of foci in GFP-Ala10-PABPN1 or GFP-Ala16-PABPN1 expressing cells 30 hours post transfection. Images were taken in 30 minutes intervals for 18 hours. Scale bar is indicated. Film shows reversion in GFP-Ala10-PABPN1 but not in GFP-Ala16-PABPN1 expressing cells.

#### Supplement 4: Cleaved-Caspase-3 expression in PABPN1 expressing cells

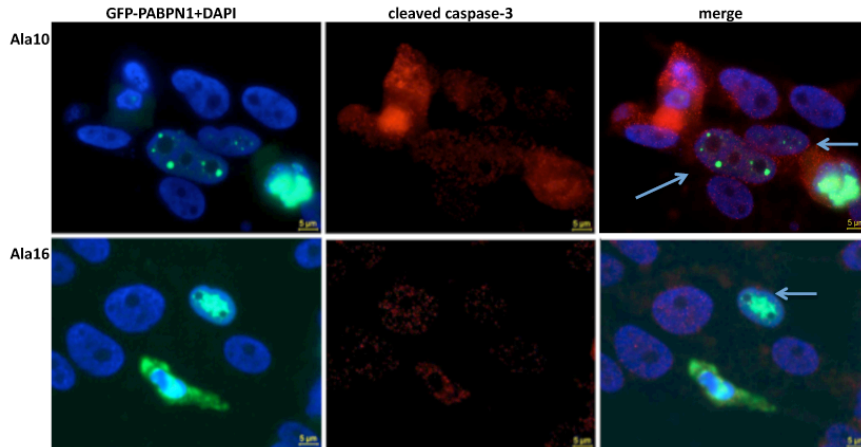

In U2OS cells that showed high overexpression of either Ala10-PABPN1 or Ala16-PABPN1 activation of apoptosis was observed. These cells were excluded from our studies. U2OS cells were transfected with YFP-Ala10-PABPN1 construct, and cells were fixed 40 hours post transfection. Immuno-labeling was carried out with the anti Cleaved-caspase-3 antibodies (R&D systems) visualized with Alexa 594-conjugated secondary antibody.

The cleaved caspase-3 is found in cells with high overexpression of PABPN1, but not in cells expressing PABPN1 2-4 fold over the endogene level (indicated by arrows).
